# Supplementary material
Source: publisher figshare collection journal article supplement (https://acs.figshare.com/ndownloader/files/13054640)
Supplement: Supplementary file 1 [file 13054640]

# Supporting Information

## **Metal (Au, Pt) Nanoparticle–Latex Nanocomposites as Probes for Immunochromatographic Test Strips with Enhanced Sensitivity**

*Yasufumi Matsumura,<sup>1\*</sup> Yasushi Enomoto,<sup>1</sup> Mari Takahashi,<sup>2</sup> Shinya Maenosono<sup>2\*</sup>*

<sup>1</sup> New Materials Development Center, Research & Development Division, Nippon Steel & Sumikin Chemical Co., Ltd., 1-Tsukiji, Kisarazu, Chiba 292-0835, Japan

<sup>2</sup> School of Materials Science, Japan Advanced Institute of Science and Technology, 1-1 Asahidai, Nomi, Ishikawa 923-1292, Japan

\*E-mail: matsumuraya@nscc.nssmc.com (Y.M.)

\*E-mail: shinya@jaist.ac.jp (S.M.)

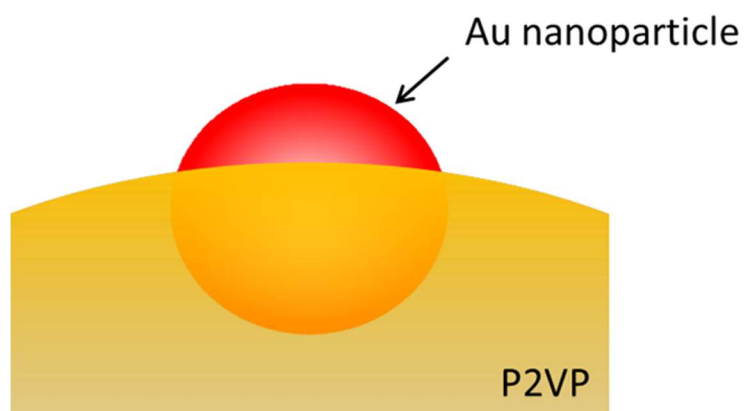

**Figure S1** Schematic illustration of an Au nanoparticle buried in a P2VP particle.

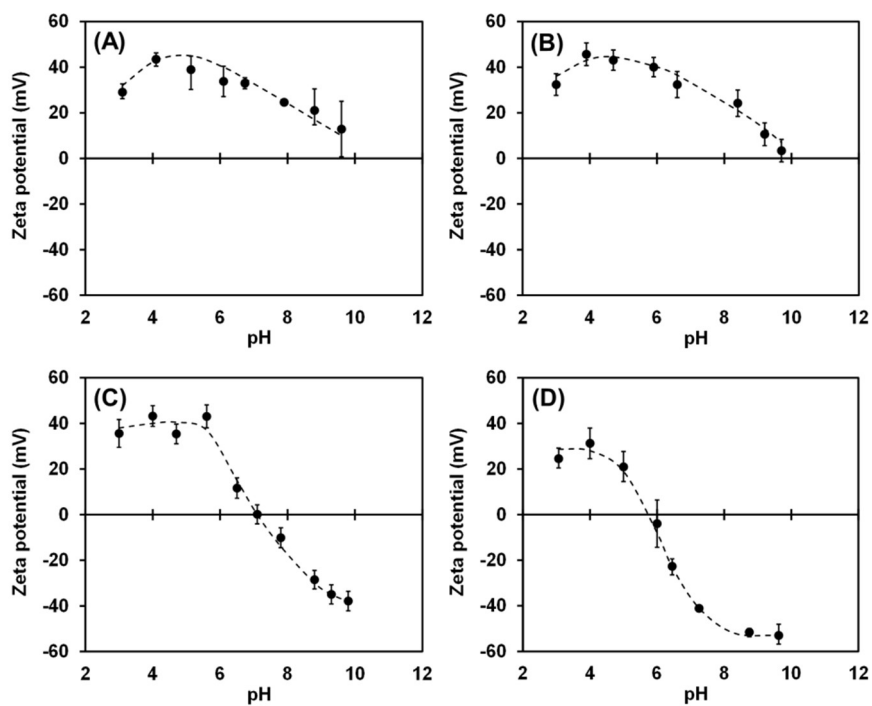

**Figure S2.** Zeta potentials of (A) Au-P2VPs, (B) Au/Pt (8:2 mol/mol)-P2VPs, (C) Au/Pt (5:5 mol/mol)-P2VPs, and (D) Pt-P2VPs.

## NMR Spectroscopy

Solid-state NMR spectra were recorded using a JEOL JNM-ECA400 spectrometer equipped with a 7-T narrow-bore superconducting magnet. The rotors were inserted into a 4-mm magic angle spinning probe, and samples were spun at 15 kHz. The probe was tuned to 100.5 MHz ( $^{13}\text{C}$  Larmor frequency).  $^{13}\text{C}$  dipolar decoupled (DDMAS) experiments were carried out with a repetition time of 200 s. Typically, 1300–1700 scans were collected and added together.

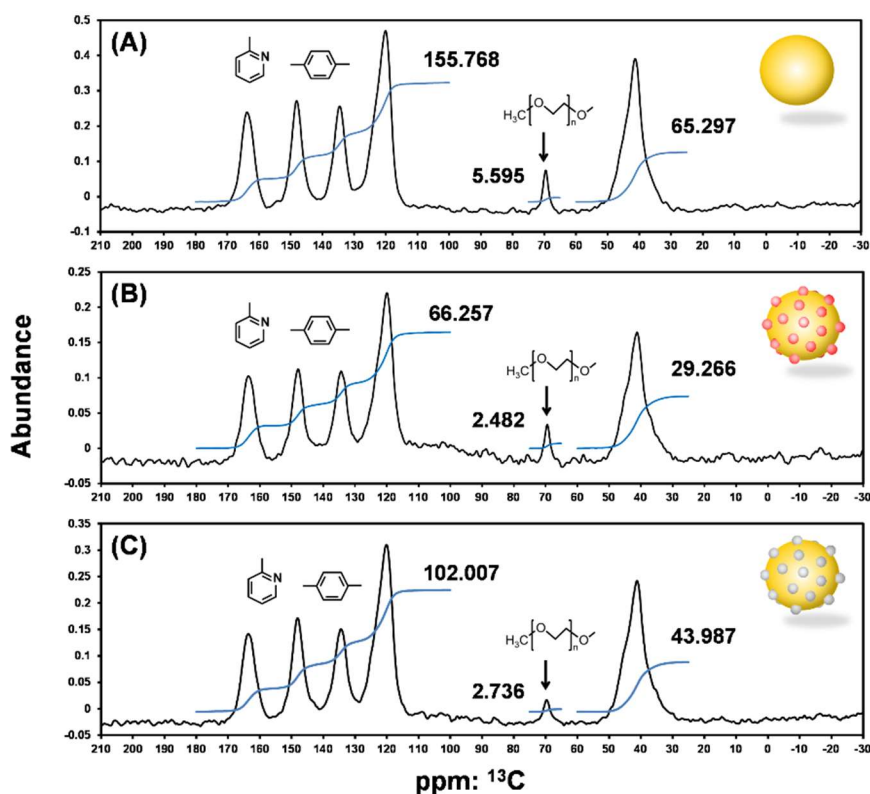

**Figure S3.** Solid-state  $^{13}\text{C}$  NMR spectra of (A) P2VPs, (B) Au-P2VPs, and (C) Pt-P2VPs.

**Table S1.** Integrals and integral ratios estimated from solid-state  $^{13}\text{C}$  NMR spectra of P2VPs, Au-P2VPs, and Pt-P2VPs.

|          | Integral      |          | Integral ratio          |
|----------|---------------|----------|-------------------------|
|          | Aromatic part | PEG part | PEG part /Aromatic part |
| P2VPs    | 155.768       | 5.595    | 0.036                   |
| Au-P2VPs | 66.257        | 2.482    | 0.037                   |
| Pt-P2VPs | 102.077       | 2.736    | 0.027                   |

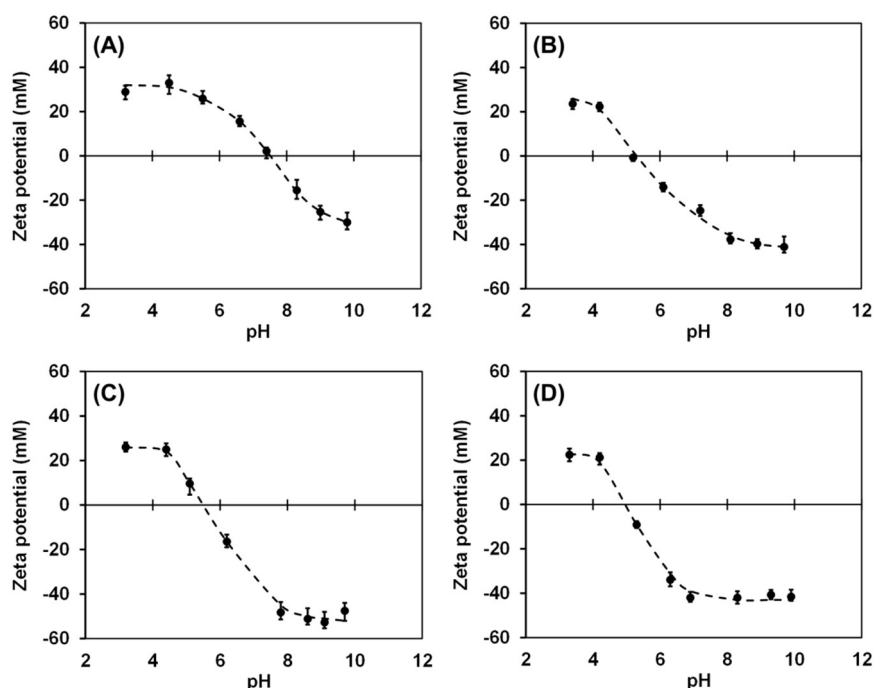

**Figure S4.** Zeta potentials of (A) Au-P2VPs measured just after treatment with mAb (just before treatment with Block Ace), (B) mAb-Au-P2VPs, (C) Pt-P2VPs measured just after treatment with mAb (just before treatment with Block Ace), and (D) mAb-Pt-P2VPs.

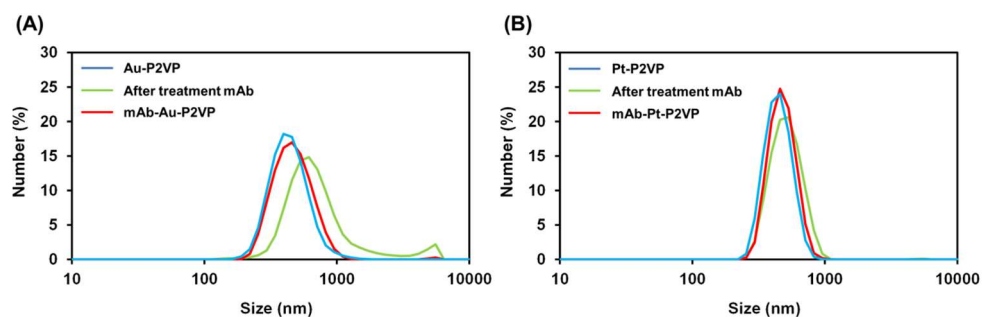

**Figure S5.** Hydrodynamic diameter distributions of (A) Au-P2VPs and (B) Pt-P2VPs. Blue, green and red lines correspond to the distribution measured before treatment with mAb, the distribution measured just after treatment with mAb (just before treatment with Block Ace) and the size distribution of mAb-Au-P2VPs, respectively.
